# Supplementary material for: Comparative genomics in acid mine drainage biofilm communities reveals metabolic and structural differentiation of co-occurring archaea
Source: PubMed Central journal article supplement (PMC3750248; doi:10.1186/1471-2164-14-485), 2013-07-17

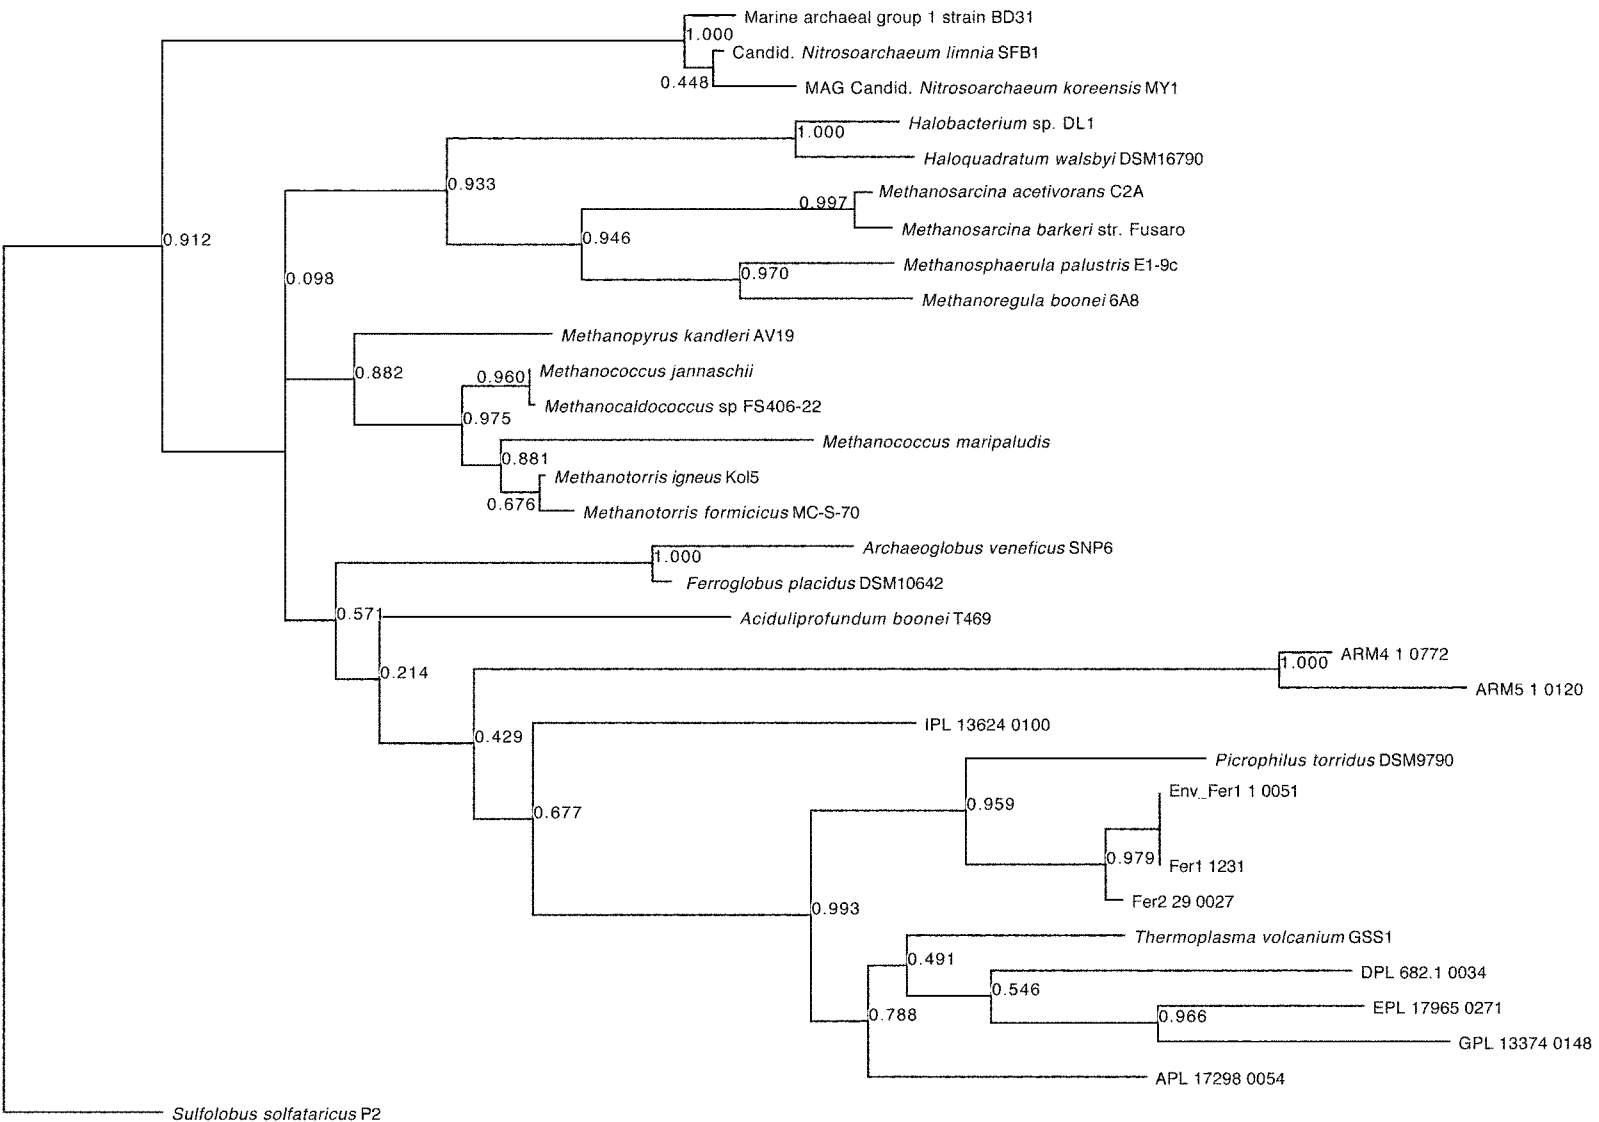

Supplement: 1471-2164-14-485-S3.pdf [file 1471-2164-14-485-S3.pdf]
